# Supplementary material for: Contextual variability in under-diagnosed cardiometabolic disease and cognitive vulnerability among populations at high risk for Alzheimer’s disease and related dementias
Source: Research Square preprint supplement (doi:10.21203/rs.3.rs-8570591/v1), 2026-01-23
Supplement: Supplementary file 1 [file 35bc23b2283e0bb149c6e0bf.docx]

**TITLE: Contextual variability in under-diagnosed cardiometabolic disease and cognitive vulnerability among populations at high risk for Alzheimer’s disease and related dementias**

**AUTHORS**

Nwanyieze Jiakponnah1*****; Joseph Curran1*****; Tamlyn Watermeyer2,3*****; Jasmit Shah4; Litha Musili4; Stanley Onyango4; Benard Aliwa4; Andy Mackelfresh5; Omonigho Michael Bubu6; Chiadi Onyike7; Ozioma Okonkwo8; Zul Merali4; Rufus Akinyemi9,10; Timothy Hughes11; Mansoor Saleh12; Melissa Petersen13; Karen Blackmon4,14; Adesola Ogunniyi9,10; Hugh Hendrie15 and Chinedu Udeh-Momoh1,4,11,16,17**†**

**AFFILIATIONS**

1. Department of Epidemiology and Prevention, Wake Forest University School of Medicine, Winston-Salem, North Carolina, USA.

2. University of Northumbria, Newcastle, UK

3. University of Edinburgh, Scotland, UK

4. Imarisha Center for Brain Health and Aging, Brain and Mind Institute, Aga Khan University, Nairobi, Kenya

5. University of North Carolina, Charlotte, North Carolina, USA

6. Departments of Psychiatry, Neurology & Population Health, NYU Grossman School of Medicine, New York, NY, USA

7. Division of Geriatric Psychiatry and Neuropsychiatry, Johns Hopkins University School of Medicine, Baltimore, USA

8. School of Medicine and Public Health, University of Wisconsin-Madison, Madison, WI, USA

9. Neuroscience and Ageing Research Unit, Institute for Advanced Medical Research and Training, College of Medicine, University of Ibadan, Ibadan, Nigeria.

10. Department of Neurology, University College Hospital, Ibadan, Oyo, Nigeria

11. Department of Internal Medicine, Section on Gerontology and Geriatrics Medicine, Wake Forest University School of Medicine, Winston-Salem, North Carolina, USA.

12. Cancer Research Unit, Aga Khan University, Nairobi, Kenya

13. Institute for Translational Research, University of North Texas Health Science Center, Fort Worth, Texas, USA

14. Geisel School of Medicine, Dartmouth University, New Hampshire, USA

15. Indiana University School of Medicine, University of Indiana, USA

16. Division of Clinical Geriatrics, Center for Alzheimer Research, Care Sciences and Society (NVS), Karolinska Institutet, Stockholm, Sweden.

17. Sheffield Institute for Translational Neuroscience, Sheffield University, Sheffield, UK.

*** Joint first authors**

**†Corresponding author:** Chinedu T Udeh-Momoh, Ph.D., FHEA, Department of Epidemiology and Prevention, Wake Forest University School of Medicine, 525 Vine St, Suite 510, Winston-Salem, NC 27101([chinedu.momoh@wfusm.edu](mailto:cmomoh@wakehealth.edu)); Brain and Mind Institute, The Aga Khan University, Nairobi, Kenya ([chinedu.momoh@aku.edu](mailto:chinedu.momoh@aku.edu))

**SUPPLEMENTAL DATA**

**Table S1 | Pairwise comparisons of cohort cardiometabolic characteristics to assess between-cohort differences**

| **Variable** | **Comparison** | **Contrast Value** | **P Value** |
| --- | --- | --- | --- |
| Age | Indianapolis - Ibadan | 1.31 | <0.001 |
| Age | Kenya - Ibadan | -20.30 | <0.001 |
| Age | Kenya - Indianapolis | -21.61 | <0.001 |
| Age | Kenya - North Texas | -6.61 | <0.001 |
| Age | North Texas - Ibadan | -13.69 | <0.001 |
| Age | North Texas - Indianapolis | -15.00 | <0.001 |
| Systolic Blood Pressure | Indianapolis - Ibadan | -5.96 | <0.001 |
| Systolic Blood Pressure | Kenya - Ibadan | -17.21 | <0.001 |
| Systolic Blood Pressure | Kenya - Indianapolis | -11.25 | <0.001 |
| Systolic Blood Pressure | Kenya - North Texas | -2.24 | 0.115 |
| Systolic Blood Pressure | North Texas - Ibadan | -14.97 | <0.001 |
| Systolic Blood Pressure | North Texas - Indianapolis | -9.01 | <0.001 |
| Fasting Blood Glucose | Indianapolis - Ibadan | 32.21 | <0.001 |
| Fasting Blood Glucose | Kenya - Ibadan | 11.45 | <0.001 |
| Fasting Blood Glucose | Kenya - Indianapolis | -20.75 | <0.001 |
| Fasting Blood Glucose | Kenya - North Texas | -9.38 | <0.001 |
| Fasting Blood Glucose | North Texas - Ibadan | 20.83 | <0.001 |
| Fasting Blood Glucose | North Texas - Indianapolis | -11.38 | <0.001 |

p-values are from pairwise comparisons between cohorts using t-tests or χ² tests, as appropriate.

**Table S2 | Associations between hypertension and dementia diagnosis by cohort**

| **Location** | **Outcome Contrast** | **Predictor** | **Odds Ratio** | **95% CI Lower** | **95% CI Upper** | **P Value** |
| --- | --- | --- | --- | --- | --- | --- |
| Ibadan | D vs N | Hypertension (SBP ≥ 130) | 1.24 | 0.55 | 2.81 | 0.601 |
| Indianapolis | D vs N | Hypertension (SBP ≥ 130) | 0.83 | 0.38 | 1.81 | 0.635 |
| North Texas | D vs N | Hypertension (SBP ≥ 130) | 1.07 | 0.62 | 1.83 | 0.814 |
| Kenya | D vs N | Hypertension (SBP ≥ 130) | 0.92 | 0.36 | 2.30 | 0.851 |

Models are cohort-stratified logistic regression models adjusted for age and sex. Odds ratios (ORs) and 95% confidence intervals are shown.*N* normal cognition*,* *D* dementia.

**Table S3 | Associations between abnormal glycemia and dementia diagnosis by cohort**

| **Location** | **Outcome Contrast** | **Predictor** | **Odds Ratio** | **95% CI Lower** | **95% CI Upper** | **P Value** |
| --- | --- | --- | --- | --- | --- | --- |
| Ibadan | D vs N | Prediabetic/Diabetic (FBG ≥ 100) | 0.00 | 0.00 | *Inf | 0.993 |
| Indianapolis | D vs N | Prediabetic/Diabetic (FBG ≥ 100) | 1.25 | 0.52 | 2.98 | 0.621 |
| North Texas | D vs N | Prediabetic/Diabetic (FBG ≥ 100) | 1.63 | 0.95 | 2.81 | 0.077 |
| Kenya | D vs N | Prediabetic/Diabetic (FBG ≥ 100) | 2.85 | 1.05 | 7.79 | **0.041** |

Models are cohort-stratified logistic regression models adjusted for age and sex.

Abnormal glycemia is defined as fasting blood glucose (FBG) ≥ 100 mg/dL. Odds ratios (ORs) and 95% confidence intervals (CI) are shown. *N* normal cognition, *D* dementia.

**Bolded** *p* values are statistically significant at *p* < 0.05.

*In Ibadan, sparse data resulted in quasi-complete separation and an infinite upper CI in a firth penalized regression model.

**Table S4 | Distribution of Alzheimer's disease-related biomarkers in North Texas cohort**

| **Variable** | **N** | **Mean (SD)** |
| --- | --- | --- |
| Aβ42 | 717 | 8.18 (2.9) |
| Aβ40 | 703 | 198.47 (115.59) |
| Aβ42/Aβ40 ratio | 702 | 0.04 (0.01) |
| GFAP | 656 | 186.15 (173.07) |
| NfL | 718 | 13.55 (11.89) |
| pTau181 | 727 | 16.52 (32.02) |
| pTau217 | 593 | 0.39 (0.32) |

Values are shown as mean (SD); N indicates available observations. Aβ42/Aβ40 is the amyloid-β 42/40 ratio; GFAP, glial fibrillary acidic protein; NfL, neurofilament light; pTau181 and pTau217, phosphorylated tau at threonine 181 and 217.

**Table S5 | Associations of cardiometabolic conditions with plasma Alzheimer's disease-related biomarkers**

| **Cardiometabolic condition** | **Biomarker** | **β (SE)** | **p value** |
| --- | --- | --- | --- |
| **Diabetes (FBG ≥ 126 mg/dL)** | Aβ42/Aβ40 ratio | −0.266 (0.142) | 0.0612 |
|  | pTau217 | 0.00009 (0.105) | 0.9993 |
|  | pTau181 | −0.037 (0.107) | 0.7268 |
|  | NfL | 0.369 (0.100) | **0.0002** |
|  | GFAP | −0.173 (0.183) | 0.3443 |
| **Severe hypertension (SBP ≥ 180 mmHg)** | Aβ42/Aβ40 ratio | 0.060 (0.332) | 0.8576 |
|  | pTau217 | 0.627 (0.268) | **0.0199** |
|  | pTau181 | 0.600 (0.297) | **0.0435** |
|  | NfL | 0.618 (0.275) | **0.0247** |
|  | GFAP | −0.113 (0.425) | 0.7904 |

Biomarkers were log10-transformed and standardized prior to analysis. Each biomarker was analyzed in a separate model adjusted for age, sex, APOE ɛ4 carrier status, and cognitive status. **Bolded** *p* values are statistically significant at *p* < 0.05. Abbreviations Aβ4 = amyloid beta; NfL = neurofilament light; GFAP = glial fibrillary acidic protein; FBG = fasting blood glucose; SBP = systolic blood pressure.

**Table S6 | Predictors of hypertension underdiagnosis in Ibadan cohort**

| **Predictor** | **Odds Ratio** | **CI Lower** | **CI Upper** | **P Value** |
| --- | --- | --- | --- | --- |
| Age | 1.00 | 0.98 | 1.02 | 0.752 |
| Sex | 1.14 | 0.90 | 1.44 | 0.289 |
| Education | 2.57 | 0.95 | 7.41 | 0.062 |
| Marital status | 1.32 | 1.05 | 1.65 | **0.017** |
| Cognitive status | 1.50 | 0.97 | 2.34 | 0.071 |
| APOE4 status | 0.79 | 0.63 | 0.99 | **0.043** |

Odds ratios (ORs) and 95% confidence intervals (CI) are shown. Hypertension was defined as systolic blood pressure (SBP) ≥ 130 mmHg. Underdiagnosis was defined as SBP ≥ 130 mmHg in the absence of a self-reported hypertension diagnosis. Reference groups: Sex = Male; Education = Secondary school or above; Marital status = Married; Cognitive status = No cognitive impairment; APOE4 status = Non-E4 Carrier. **Bolded** *p* values are statistically significant at *p* < 0.05.

**Table S7 | Predictors of hypertension underdiagnosis in Indianapolis cohort**

| **Predictor** | **Odds Ratio** | **CI Lower** | **CI Upper** | **P Value** |
| --- | --- | --- | --- | --- |
| Age | 0.97 | 0.94 | 1.00 | **0.025** |
| Sex | 0.59 | 0.44 | 0.79 | **0.000** |
| Education | 0.89 | 0.67 | 1.18 | 0.425 |
| Marital status | 0.79 | 0.59 | 1.05 | 0.101 |
| Cognitive status | 0.64 | 0.30 | 1.35 | 0.241 |
| APOE4 status | 1.29 | 0.97 | 1.73 | 0.081 |

Odds ratios (ORs) and 95% confidence intervals (CI) are shown. Hypertension was defined as systolic blood pressure (SBP) ≥ 130 mmHg. Underdiagnosis was defined as SBP ≥ 130 mmHg in the absence of a self-reported hypertension diagnosis**.** Reference groups: Sex = Male; Education = Secondary school or above; Marital status = Married; Cognitive status = No cognitive impairment; APOE4 status = Non-E4 carrier. **Bolded** *p* values are statistically significant at *p* < 0.05.

**Table S8 | Predictors of hypertension underdiagnosis in North Texas cohort**

| **Predictor** | **Odds Ratio** | **CI Lower** | **CI Upper** | **P Value** |
| --- | --- | --- | --- | --- |
| Age | 0.97 | 0.94 | 0.99 | **0.004** |
| Sex | 0.80 | 0.56 | 1.14 | 0.216 |
| Education | 0.84 | 0.43 | 1.65 | 0.613 |
| Marital status | 1.12 | 0.79 | 1.60 | 0.520 |
| Cognitive status | 0.94 | 0.65 | 1.35 | 0.721 |
| APOE4 Status | 0.86 | 0.60 | 1.23 | 0.402 |
| SDI | 1.00 | 0.83 | 1.21 | 0.992 |

Odds ratios (ORs) and 95% confidence intervals (CI) are shown. Hypertension was defined as systolic blood pressure (SBP) ≥ 130 mmHg. Underdiagnosis was defined as SBP ≥ 130 mmHg in the absence of a self-reported hypertension diagnosis**.** Reference groups: Sex = Male; Education = Secondary school and above; Marital status = Married; Cognitive status = No cognitive impairment; APOE4 status = Non-E4 carrier. **Bolded** *p* values are statistically significant at *p* < 0.05.

**Table S9 | Predictors of hypertension underdiagnosis in Kenya cohort**

| **Predictor** | **Odds Ratio** | **CI Lower** | **CI Upper** | **P Value** |
| --- | --- | --- | --- | --- |
| Age | 0.98 | 0.95 | 1.02 | 0.357 |
| Sex | 0.60 | 0.26 | 1.37 | 0.221 |
| Education | 1.62 | 0.60 | 4.39 | 0.339 |
| Marital status | 0.58 | 0.24 | 1.37 | 0.213 |
| Cognitive status | 0.95 | 0.38 | 2.34 | 0.905 |
| Multidimensional Poverty Index | 0.79 | 0.53 | 1.18 | 0.257 |

Odds ratios (ORs) and 95% confidence intervals (CI) are shown. Hypertension was defined as systolic blood pressure (SBP) ≥ 130 mmHg. Underdiagnosis was defined as SBP ≥ 130 mmHg in the absence of a self-reported hypertension diagnosis**.** Reference groups: Sex = Male; Education = Secondary school and above; Marital status = Married; Cognitive status = No cognitive impairment. **Note**: APOE4 status was not included in the Kenya model owing to unavailability.

**Table S10 | Predictors of abnormal glycemia underdiagnosis in Ibadan cohort**

| **Predictor** | **Odds Ratio** | **CI Lower** | **CI Upper** | **P Value** |
| --- | --- | --- | --- | --- |
| Age | 0.89 | 0.79 | 1.01 | 0.073 |
| Sex | 0.14 | 0.00 | 1.23 | 0.083 |
| Marital status | 0.59 | 0.10 | 2.86 | 0.515 |
| Cognitive status | 11.66 | 0.37 | 2,204.75 | 0.168 |
| APOE4 status | 0.64 | 0.13 | 3.21 | 0.576 |

Odds ratios (ORs) and 95% confidence intervals (CI) are shown. Abnormal glycaemia was defined as fasting blood glucose (FBG) ≥ 100 mg/dL. Underdiagnosis was defined as FBG ≥ 100 mg/dL in the absence of a self-reported diabetes diagnosis. Reference groups: Sex = Male; Marital status = Married; Cognitive status = No cognitive impairment; APOE4 status = Non-E4 carrier. Sparse data in the cognitive status categories resulted an unstable OR with a wide CI. **Note**: Education was omitted from this model due to non-estimation.

**Table S11 | Predictors of abnormal glycemia underdiagnosis in the Indianapolis cohort**

| **Predictor** | **Odds Ratio** | **CI Lower** | **CI Upper** | **P Value** |
| --- | --- | --- | --- | --- |
| Age | 1.02 | 1.00 | 1.05 | 0.098 |
| Sex | 1.06 | 0.77 | 1.45 | 0.712 |
| Education | 1.01 | 0.74 | 1.36 | 0.973 |
| Marital status | 1.13 | 0.83 | 1.55 | 0.425 |
| Cognitive status | 1.62 | 0.79 | 3.35 | 0.189 |
| APOE4 status | 1.06 | 0.78 | 1.45 | 0.696 |

Odds ratios (ORs) and 95% confidence intervals are shown. Abnormal glycaemia was defined as fasting blood glucose (FBG) ≥ 100 mg/dL. Underdiagnosis was defined as FBG ≥ 100 mg/dL in the absence of a self-reported diabetes diagnosis. Reference groups: Sex = Male; Education = Secondary school and above; Marital status = Married; Cognitive status = No cognitive impairment; APOE4 status = Non-E4 carrier.

**Table S12 | Predictors of abnormal glycemia underdiagnosis in North Texas cohort**

| **Predictor** | **Odds Ratio** | **CI Lower** | **CI Upper** | **P Value** |
| --- | --- | --- | --- | --- |
| Age | 0.99 | 0.96 | 1.02 | 0.382 |
| Sex | 1.01 | 0.65 | 1.58 | 0.964 |
| Education | 0.38 | 0.16 | 0.92 | **0.032** |
| Marital status | 1.59 | 1.02 | 2.49 | **0.041** |
| Cognitive status | 0.96 | 0.62 | 1.51 | 0.874 |
| APOE4 status | 1.36 | 0.86 | 2.14 | 0.188 |
| SDI | 1.04 | 0.82 | 1.30 | 0.756 |

Odds ratios (ORs) and 95% confidence intervals are shown. Abnormal glycaemia was defined as fasting blood glucose (FBG) ≥ 100 mg/dL. Underdiagnosis was defined as FBG ≥ 100 mg/dL in the absence of a self-reported diabetes diagnosis. SDI = Socioeconomic disadvantage index. Reference groups: Sex = Male; Education = Secondary school and above; Marital status = Married; Cognitive status = NCI; APOE4 status = Non-E4 carrier.

**Table S13 | Predictors of abnormal glycemia underdiagnosis in Kenya cohort**

| **Predictor** | **Odds Ratio** | **CI Lower** | **CI Upper** | **P Value** |
| --- | --- | --- | --- | --- |
| Age | 0.97 | 0.91 | 1.04 | 0.361 |
| Sex | 0.75 | 0.19 | 2.89 | 0.676 |
| Education | 6.07 | 0.66 | 56.03 | 0.112 |
| Marital status | 0.76 | 0.19 | 3.00 | 0.697 |
| Cognitive status | 0.33 | 0.07 | 1.52 | 0.156 |
| Multidimensional Poverty Index | 3.18 | 1.10 | 9.21 | **0.033** |

Odds ratios (ORs) and 95% confidence intervals are shown. Abnormal glycaemia was defined as fasting blood glucose (FBG) ≥ 100 mg/dL. Underdiagnosis was defined as FBG ≥ 100 mg/dL in the absence of a self-reported diabetes diagnosis. Reference groups: Sex = Male; Education = Secondary school and above; Marital status = Married; Cognitive status = NCI; **Bolded** *p* values are statistically significant at *p* < 0.05. **Note**: APOE4 status was not included in the Kenya model owing to unavailability.
